# Supplementary material
Source: PubMed Central journal article supplement (PMC2657421)
Supplement: 0808180106_0808180106SI.pdf [file 0808180106_0808180106SI.pdf]

# Supporting Information

Scheer et al. 10.1073/pnas.0808180106

## SI Text

**Conversion Factors.** The conversion factors from conventional and/or metric units to Système International units: leptin, nmol/L, multiply ng/mL values by 0.0625; glucose, mmol/L, multiply mg/dL values by 0.0555; insulin, pmol/L, multiply

$\mu$ IU/mL by 6.95; urinary epinephrine, nmol/24 h, multiply  $\mu$ g/24 h values by 5.46; urinary norepinephrine, nmol/24 h, multiply  $\mu$ g/24 h values by 5.92; cortisol, nmol/L, multiply  $\mu$ g/dL values by 27.6.
